# Supplementary material for: Insights into the bulk kinetics of a 2K radical polymerization system based on the copper catalyzed cleavage of diboranes and its perspectives
Source: Royal Society of Chemistry journal article supplement (doi:10.1039/d4py01102c), 2024-12-13
Supplement: d4py01102c1.pdf [file d4py01102c1.pdf]

## Supporting Information

### Insights into the Bulk Kinetics of a 2K Radical Polymerization System Based on the Copper Catalyzed Cleavage of Diboranes and its Perspectives

F. Pieringer, Y. Catel, R. Liska, P. Knaack

#### Materials

B1 (5,5,5',5'-Tetramethyl-2,2'-bi-1,3,2-dioxaborinan) (98%, BLD Pharm), B3 (4,8-Dimethyl-2-(4,4,5,5-tetramethyl-1,3,2-dioxaborolan-2-yl)-1,3,6,2-dioxazaborocane) (95%, abcr), B4 (2-(Dimethylphenylsilyl)-4,4,5,5-tetramethyl-1,3,2-dioxaborolan) (95%, Merck), Cu(acac)<sub>2</sub> (99.9%, Merck), tetrakis(dimethylamino)diboron (98%, BLD Pharm), 3-methylbutane-1,3-diol (97%, Merck), benzylmethacrylate (Sigma), methylmethacrylate (VWR), benzylacrylate (TCI), isobutylvinylether (TCI), dimethylacrylamide (Sigma), acrylomorpholine (Sigma), acetonitrile (ACROS) and styrene (ACROS) were used as received.

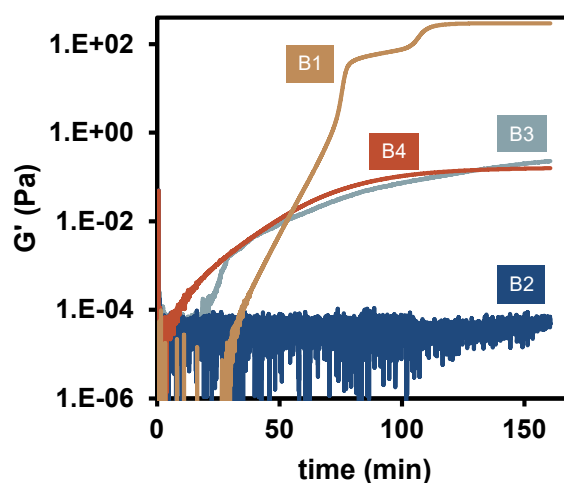

**SI Figure 1:**  $G'$  resulting from rheology/IR measurements of the polymerization of BzMA using either 3.5 mol% B1, B2, B3 or B4 and 0.2 mol% Cu(acac)<sub>2</sub> with logarithmic scale of the y-axis.

**SI-Table 1:** Summarized data derived from rheology/IR measurements of the polymerization of BzMA using 3.5 mol% of the respective diborane B1, B2, B3 or B4 and 0.2 mol% Cu(acac)<sub>2</sub>. SEC measurements of polymers derived from the same concentrations, but prepared in larger bulk scale (500 mg) are included.

|    | $t_{\text{gel}}$ (min) | $\text{DBC}_{\text{end}}$ (%) | $k_p$ (db% s <sup>-1</sup> ) | $R_p$ (mol s <sup>-1</sup> ) | $M_n$ (kDa) | $M_w$ (kDa) | PDI ( ) |
|----|------------------------|-------------------------------|------------------------------|------------------------------|-------------|-------------|---------|
| B1 | 108                    | 96                            | 0.018                        | $2.01 \cdot 10^{-5}$         | 660         | 1984        | 3.0     |
| B2 | -                      | 5.7                           | 0.001                        | $1.59 \cdot 10^{-6}$         | 632         | 2127        | 3.4     |
| B3 | -                      | 9.1                           | 0.002                        | $2.50 \cdot 10^{-6}$         | -           | -           | -       |
| B4 | -                      | 56                            | 0.015                        | $1.75 \cdot 10^{-5}$         | 696         | 2339        | 3.4     |

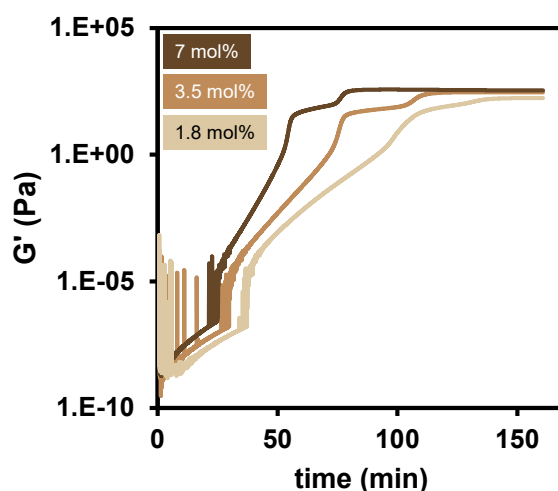

**SI-Figure 2:**  $G'$  resulting from rheology/IR measurements of the polymerization of BzMA using either 1.8 mol% B1, 3.5 mol% B1 or 7 mol% B1 and 0.2 mol% Cu(acac)<sub>2</sub> with logarithmic scale of the y-axis.

**SI-Table 2** Summarized data derived from rheology/IR measurements of the polymerization of BzMA using either 1.8 mol% B1, 3.5 mol% B1 or 7 mol% B1 and 0.2 mol% Cu(acac)<sub>2</sub>.

|          | $k_p$ (db% s <sup>-1</sup> ) | $R_p$ (mol s <sup>-1</sup> ) |
|----------|------------------------------|------------------------------|
| 7 mol%   | 0.018                        | $2.04 \cdot 10^{-5}$         |
| 3.5 mol% | 0.018                        | $2.01 \cdot 10^{-5}$         |
| 1.8 mol% | 0.012                        | $1.35 \cdot 10^{-5}$         |

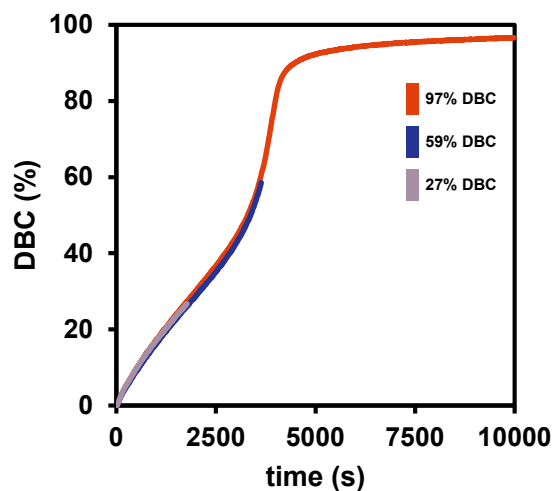

**SI-Figure 3:** IR measurements of the polymerization of BzMA using 3.5 mol% B1 and 0.2 mol% Cu(acac)<sub>2</sub> interrupted at certain times to evaluate molecular mass from SEC. The reproducibility of methods is highly emphasized.

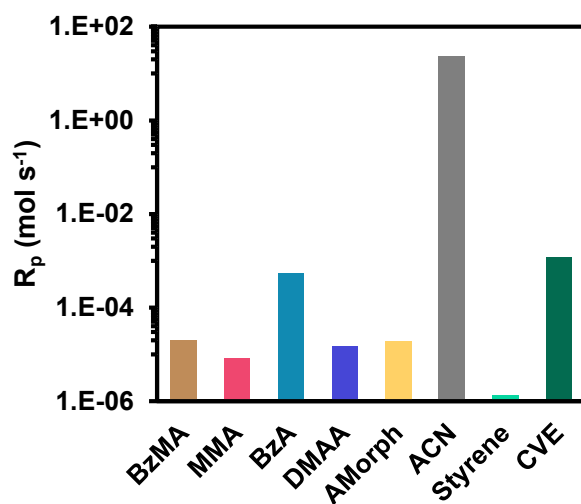

**SI Figure 4:** Rate of polymerization ( $R_p$ ) of different monomers using 3.5 mol% B1 and 0.2 mol% Cu(acac)<sub>2</sub> derived from the rheology/IR measurements shown in figure 5A.

**SI-Table 3:** Summarized data derived from rheology/IR measurements of the polymerization of different monomers including BzMA, MMA, BzA, DMAA, A-Morph, AN, Styrene and isoBVE and the evaluated  $t_{\text{gel}}$ ,  $\text{DBC}_{\text{gel}}$  and  $\text{DBC}_{\text{end}}$ . SEC measurements of polymers derived from the same concentrations, but prepared in larger bulk scale (500 mg) are included.

|         | $M_n$ (kDa) | $M_w$ (kDa) | PDI (-) | $k_p$ (db%/s <sup>-1</sup> ) | $R_p$ (mol s <sup>-1</sup> ) |
|---------|-------------|-------------|---------|------------------------------|------------------------------|
| BzMA    | 660         | 1984        | 3       | 0.018                        | $2.01 \cdot 10^{-5}$         |
| MMA     | 57          | 116         | 2       | 0.004                        | $8.19 \cdot 10^{-6}$         |
| BzA     | 88          | 754         | 6.4     | 0.441                        | $5.43 \cdot 10^{-4}$         |
| DMAA    | < 1         | < 1         | -       | 0.008                        | $1.51 \cdot 10^{-5}$         |
| A-Morph | < 1         | < 1         | -       | 0.014                        | $1.96 \cdot 10^{-5}$         |
| AN      | n.s.        | n.s.        | n.s.    | 0.249                        | 2.41                         |
| ST      | 24          | 56          | 2.4     | 0.001                        | $1.34 \cdot 10^{-6}$         |
| isoBVE  | 3.5         | 8.4         | 4.5     | 0.601                        | $1.20 \cdot 10^{-3}$         |

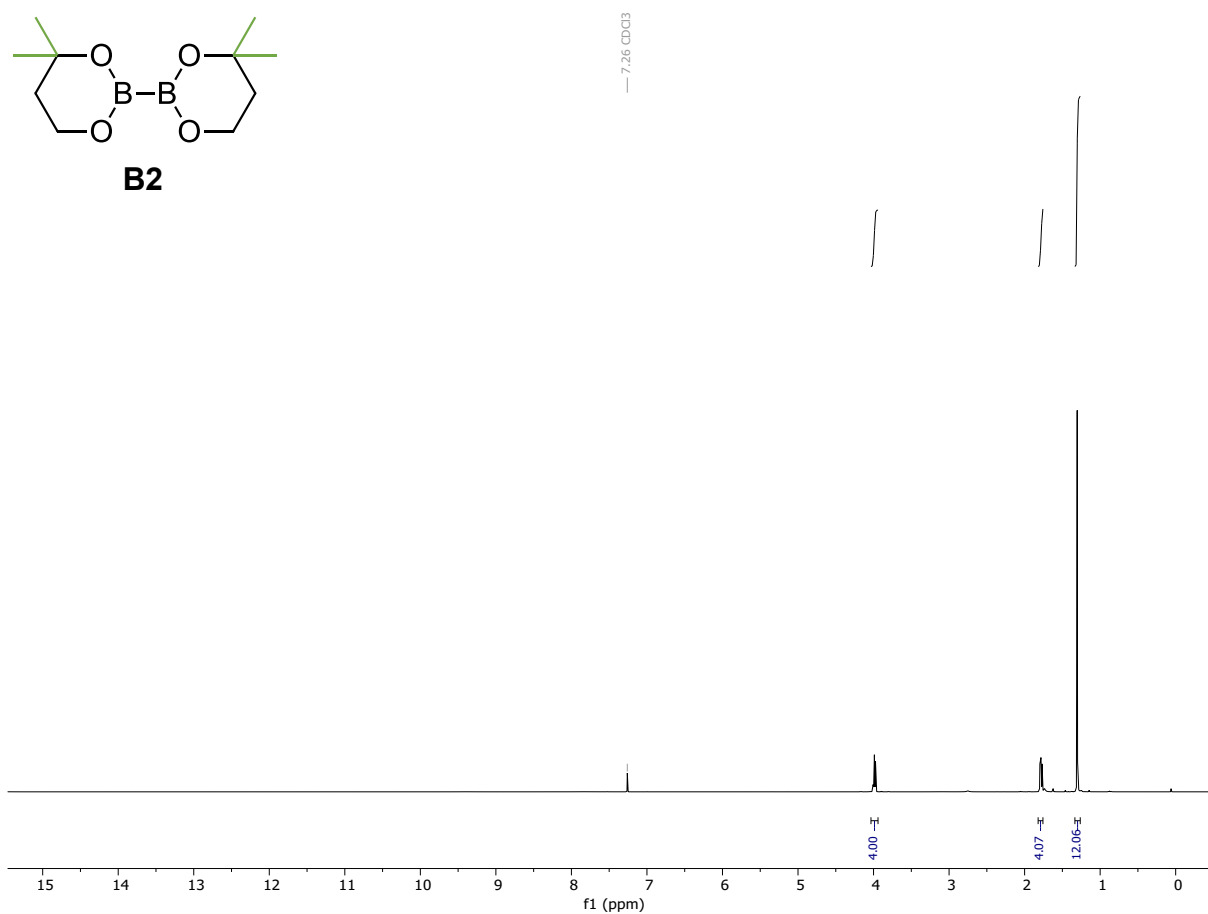

**SI-Figure 5:**  $^1\text{H-NMR}$  of B2

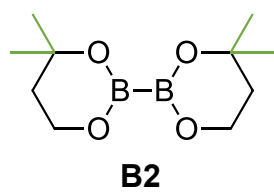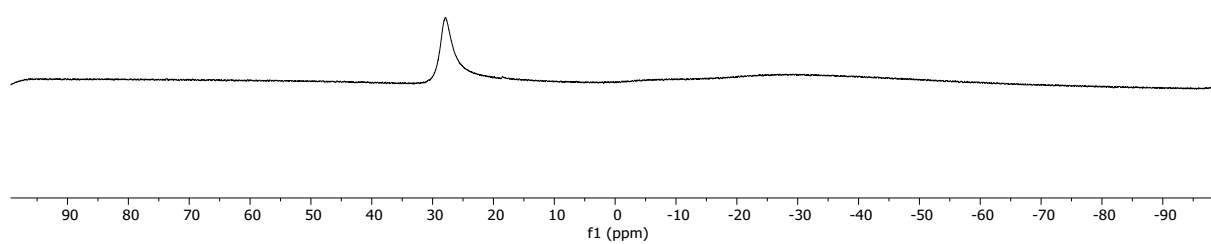

SI-Figure 6:  $^{11}\text{B}$ -NMR of B2
